1 **The dual nature of bacteriophage: growth-dependent predation and**  
2 **generalised transduction of antimicrobial resistance**

3

4 Quentin J Leclerc<sup>1,2\*</sup>, Jacob Wildfire<sup>2,3</sup>, Arya Gupta<sup>3+</sup>, Jodi A Lindsay<sup>3</sup>, Gwenan M Knight<sup>1,2</sup>

5

6 <sup>1</sup> Centre for Mathematical Modelling of Infectious Diseases, Department of Infectious Disease  
7 Epidemiology, Faculty of Epidemiology & Population Health, London School of Hygiene & Tropical  
8 Medicine, UK

9 <sup>2</sup> Antimicrobial Resistance Centre, London School of Hygiene and Tropical Medicine, UK

10 <sup>3</sup> Institute for Infection & Immunity, St George's University of London, UK

11 <sup>+</sup> Present address: School of Biosciences, University of Kent, UK

12

13 \* corresponding author: [quentin.leclerc@lshtm.ac.uk](mailto:quentin.leclerc@lshtm.ac.uk)

## 14 Abstract

15 Bacteriophage (“phage”) are both predators and evolutionary drivers for bacteria, notably  
16 contributing to the spread of antimicrobial resistance (AMR) genes by generalised transduction. Our  
17 current understanding of the dual nature of this relationship is limited. We used an interdisciplinary  
18 approach to quantify how these interacting dynamics can lead to the evolution of multi-drug resistant  
19 bacteria. We co-cultured two strains of Methicillin-resistant *Staphylococcus aureus*, each harbouring  
20 a different antibiotic resistance gene, with 80α generalized transducing phage. After a growth phase  
21 of 8h, bacteria and phage surprisingly coexisted at a stable equilibrium in our culture, the level of  
22 which was dependent on the starting concentration of phage. We detected double-resistant bacteria  
23 as early as 7h, indicating that transduction of AMR genes had occurred. We developed multiple  
24 mathematical models of the bacteria and phage relationship, and found that phage-bacteria dynamics  
25 were best captured by a model in which the phage burst size decreases as the bacteria population  
26 reaches stationary phase, and where phage predation is frequency-dependent. We estimated that  
27 one in every  $10^8$  new phage generated was a transducing phage carrying an AMR gene, and that  
28 double-resistant bacteria were always predominantly generated by transduction rather than by  
29 growth. Our results suggest a fundamental shift in how we understand and model phage-bacteria  
30 dynamics. Although rates of generalised transduction may seem insignificant, they are sufficient to  
31 consistently lead to the evolution of multi-drug resistant bacteria. Currently, the potential of phage to  
32 contribute to the growing burden of AMR is likely underestimated.

## 33 Main

34 To counter the rapidly increasing global public health threat of antimicrobial resistance (AMR), we  
35 must urgently develop new solutions <sup>1</sup>. “Phage therapy” is one such tool which has recently seen a  
36 renewed interest <sup>2</sup>. This relies on using bacteriophage (or “phage”), major bacteria predators and the  
37 most abundant organisms on the planet <sup>3</sup>, as antimicrobial agents. However, phage are also natural  
38 drivers of bacterial evolution through horizontal gene transfer by “transduction” <sup>4,5</sup>. AMR genes can  
39 be transferred by transduction at high rates, both *in vitro* and *in vivo* <sup>6–8</sup>. The dual nature of phage  
40 (predation and transduction) makes them a double-edged sword in the fight against AMR, as they are  
41 themselves capable of contributing to the spread of the problem they aim to solve, yet our  
42 understanding of these dynamics and how to best represent them is limited.

43 There are two types of transduction; here, we focus on “generalised transduction”, which occurs  
44 during the phage lytic cycle, when non-phage genome DNA is mistakenly packaged in a new phage  
45 particle (Fig. 1). The resulting transducing phage released upon lysis can then inject this genetic  
46 material into another bacterium. Current guidelines for phage therapy recommend that exclusively  
47 lytic phage should be used, removing the risk of the second type of transduction which relies on  
48 lysogeny (“specialised transduction”) <sup>9,10</sup>. The possibility of generalised transduction remains, yet is  
49 currently widely dismissed as too rare to be significant, despite being a common mechanism for the  
50 transfer of plasmids, major vectors of AMR genes <sup>4</sup>. Previous reviews have highlighted the necessity  
51 to further investigate the potential impact of transduction in the context of phage therapy <sup>11–13</sup>.

52 Mathematical models have been used to gain insights into phage predation dynamics which cannot  
53 be obtained solely with experimental work <sup>14</sup>. Such models typically assume a density-dependent  
54 interaction, with new phage infections calculated as the number of susceptible bacteria, multiplied by  
55 the number of phage and an adsorption constant <sup>14–16</sup>. This approach has limitations, as density-  
56 dependent models have failed to predict equilibriums observed *in vitro* between phage and *E. coli* <sup>17</sup>.

57 Moreover, phage and bacterial replication are likely to be linked, as they both rely on the bacterial  
58 machinery; phage predation may slow as bacteria reach stationary phase <sup>14,17–23</sup>. This is still unclear,  
59 as models often only rely on data of phage-bacteria interactions measured once per day, or for a few  
60 hours <sup>17–19,24</sup>. A current lack of detailed data means that capturing these underlying dynamics which  
61 occur in less than an hour has not yet been possible.

62 To the best of our knowledge, only three modelling studies have included transduction of AMR genes  
63 <sup>25–27</sup>. All three modelled complex environments, including resistance to phage, antibiotics, and both  
64 lytic and lysogenic cycles. This complexity, combined with the fact that these studies were not paired  
65 with complementary *in vitro* or *in vivo* data, means that they relied on assumptions and previously  
66 published estimates, instead of parameter values derived from a single environment and set of  
67 conditions. This limits the wider reliability of conclusions made using these models <sup>13</sup>.

68 In this article, we investigate the dual nature of phage dynamics using the clinically relevant bacteria  
69 Methicillin-resistant *Staphylococcus aureus* (MRSA) <sup>28</sup>. Transduction is the main mechanism of  
70 horizontal gene transfer driving evolution for these bacteria <sup>29</sup>, and phage therapy is currently being  
71 investigated to treat MRSA infections <sup>30,31</sup>. We generate novel *in vitro* data on the interaction between  
72 MRSA and phage capable of generalised transduction, while simultaneously developing mathematical  
73 models to clarify the underlying dynamics.

74

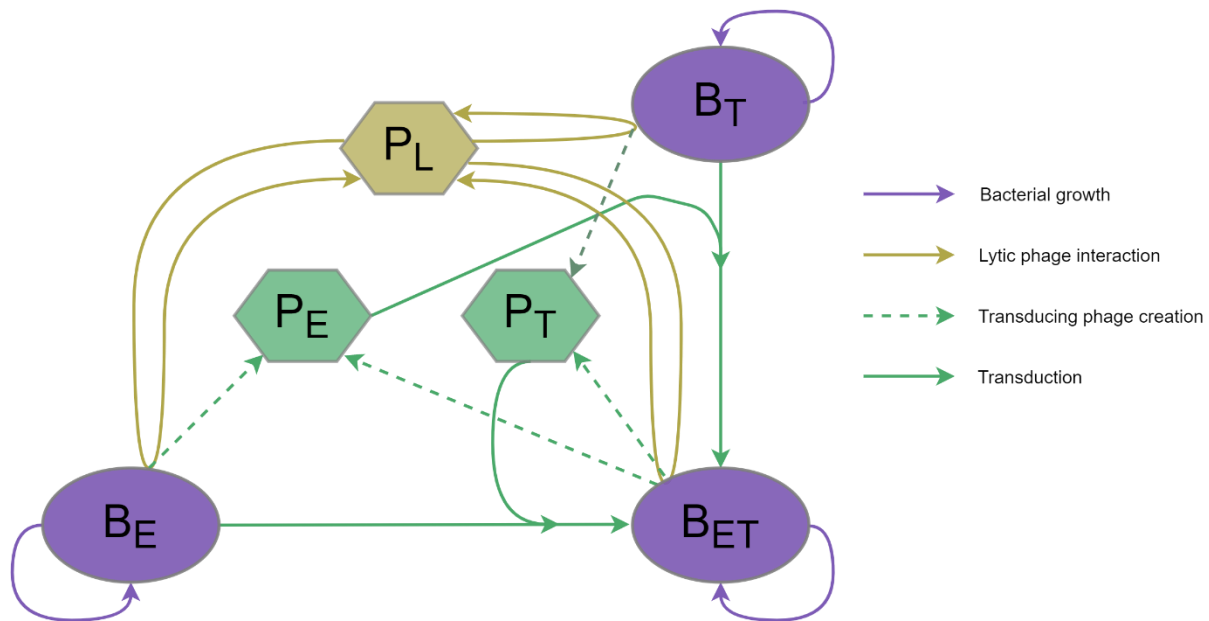

**Fig. 1: Phage lytic cycle and generalised transduction.** In this environment, only some bacteria carry an antimicrobial resistance (AMR) gene (shown in green). The lytic cycle starts when a lytic phage infects a bacterium by binding and injecting its DNA (1). Phage molecules degrade bacterial DNA and utilise bacterial resources to create new phage components and replicate (2). These components are then assembled to form new phage particles (3). At this stage, bacterial DNA leftover in the cell can be packaged by mistake instead of phage DNA, which creates a transducing phage and starts the process of generalised transduction. In our example, the transducing phage carries the AMR gene. After a latent period of typically several minutes, the phage trigger lysis of the bacterium, bursting it and releasing the phage (4). The transducing phage can infect another bacterium, binding and injecting the AMR gene it is carrying (5). If this gene is successfully integrated into the bacterial chromosome (6), this creates a new transductant bacterium carrying this AMR gene (7). Note that the transduced bacterial DNA could also be a plasmid, in which case it would circularise instead of integrating into the chromosome of the transductant bacterium. Not to scale.

## 89 Results

### 90 Transduction and phage predation dynamics *in vitro*

91 We focused on two laboratory strains of *Staphylococcus aureus*, each resistant to either erythromycin  
92 (and referred to as B<sub>E</sub>) or tetracycline (B<sub>T</sub>). In our experimental conditions, the antimicrobial resistance  
93 (AMR) genes can only be transferred between bacteria by generalised transduction mediated by  
94 exogenous phage. Transduction of either AMR gene to the other strain will result in the formation of  
95 double-resistant progeny (referred to as B<sub>ET</sub>).

96 We conducted a co-culture with only the two single-resistant strains and exogenous lytic phage 80α  
97 (P<sub>L</sub>) capable of generalised transduction. We grew the bacteria and phage over 24h, with hourly counts  
98 of bacteria and lytic phage between 0-8h and 16-24h. The starting concentration of bacteria was 10<sup>4</sup>  
99 colony-forming units (cfu) per mL, and of phage was approximately either 10<sup>3</sup>, 10<sup>4</sup> or 10<sup>5</sup> plaque-  
100 forming units (pfu) per mL, equivalent to multiplicities of infection of 0.1, 1 and 10 (defined as starting  
101 ratio of phage to bacteria <sup>32</sup>).

102 We detected double-resistant progeny (B<sub>ET</sub>) as early as 7h in our co-cultures, indicating that transfer  
103 of AMR genes by generalised transduction had occurred (Fig. 2). B<sub>ET</sub> numbers remained below 100  
104 cfu/mL after 24h, but were consistently generated in each of our experimental replicates.

105 The starting concentration of exogenous phage affected the equilibrium values in our co-cultures (Fig.  
106 2). With a starting concentration of either 10<sup>3</sup> or 10<sup>4</sup> pfu/mL, lytic phage reached an equilibrium after  
107 8h (at approximately 10<sup>5</sup> pfu/mL for a starting concentration of 10<sup>3</sup>, and 10<sup>7</sup> pfu/mL for 10<sup>4</sup>). In both  
108 cases, bacteria replicated for 8h before reaching an equilibrium around 10<sup>9</sup> cfu/mL, similar to what  
109 was seen in the absence of exogenous phage (Supplementary Fig. 1). With a starting phage  
110 concentration of 10<sup>5</sup> pfu/mL, we did not see an equilibrium, as phage numbers kept increasing up to

111  $10^{10}$  pfu/mL by 24h, and bacteria numbers started decreasing after 20h. The datasets are shown  
112 overlaid in Supplementary Fig. 2.

113 We confirmed that the equilibriums described were not due to bacteria becoming resistant to phage  
114 during the 24h co-culture by repeating our experiment with an inocula of bacteria previously exposed  
115 to the phage for 24h, instead of stock bacteria. We did not see any difference in phage and bacteria  
116 numbers after 24h when using either the previously exposed or stock bacteria (data not shown).

117

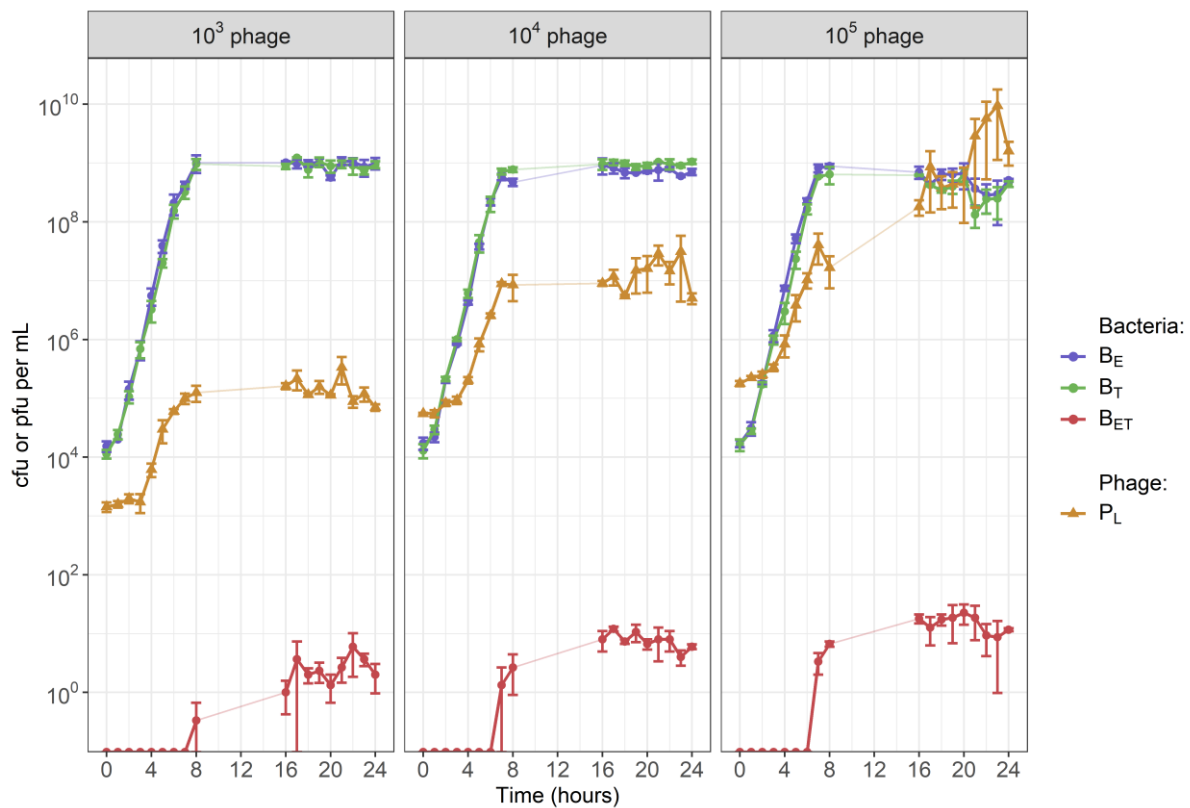

119 **Fig. 2: The starting concentration of exogenous phage 80 $\alpha$  affected the equilibrium values of phage**  
120 **and bacteria in our co-cultures.** The starting concentration of both single-resistant *S. aureus* parent  
121 strains ( $B_E$  to erythromycin &  $B_T$  to tetracycline) was  $10^4$  colony-forming units (cfu) per mL. Each panel  
122 shows the results with a different starting concentration of exogenous phage 80 $\alpha$  ( $P_L$ ): either  $10^3$ ,  $10^4$   
123 or  $10^5$  plaque-forming units (pfu) per mL. We detected double-resistant progeny ( $B_{ET}$ ) as early as 7h,

124 indicating that transduction occurred rapidly. Error bars indicate mean +/- standard error, from 3  
125 experimental replicates. There is no data for the time period 9h-15h.

## 126 **Bacterial growth estimates in the absence of exogenous phage**

127 When grown together in the absence of exogenous phage, single and double resistant bacteria  
128 replicated exponentially and reached stationary phase after 8h at  $10^9$  colony-forming units (cfu) per  
129 mL (Supplementary Fig. 1).  $B_E$  did not show a significant fitness cost relative to  $B_T$  over 24h of growth  
130 (mean relative fitness 1.02, sd 0.03). The double-resistant progeny  $B_{ET}$  did not show a significant fitness  
131 cost relative to either single-resistant parent strain (mean relative fitness to  $B_E$ : 0.96, sd 0.06; mean  
132 relative fitness to  $B_T$ : 0.98, sd 0.03).

133 We obtained growth rate estimates by fitting a logistic growth model to the *in vitro* data. The median  
134 estimated growth rates were 1.61 for  $B_E$  (95% credible interval 1.59-1.63), 1.51 for  $B_T$  (1.49-1.53) and  
135 1.44 for  $B_{ET}$  (1.42-1.47), with a total carrying capacity of  $2.76 \times 10^9$  cfu/mL ( $2.61 \times 10^9$  -  $2.98 \times 10^9$ ).

136

## 137 **Investigation of possible phage-bacteria interactions using a flexible** 138 **modelling framework**

### 139 *Model structure*

140 We designed a mathematical model to reproduce the *in vitro* phage-bacteria dynamics, including  
141 generalised transduction of resistance genes. During our experiment, our co-culture contained up to  
142 three strains of bacteria: the two single-resistant parents ( $B_E$ ,  $B_T$ ) and the double-resistant progeny  
143 ( $B_{ET}$ ). Although we were only able to count lytic phage ( $P_L$ ), based on the biology of generalised  
144 transduction (Fig. 1) we know that there were also transducing phage carrying either the erythromycin



145 resistance gene ( $P_E$ ), or the tetracycline resistance gene ( $P_T$ ). The corresponding model diagram is  
146 shown in Fig. 3a. The complete model equations can be found in Methods.

147 Using this modelling framework, we explored a combination of different phage-bacteria interactions,  
148 described below (Fig. 3b-c). By fitting the models to our experimental data, we could rule out certain  
149 interactions and suggest the best model to reproduce the phage-bacteria dynamics seen *in vitro*.

150

151

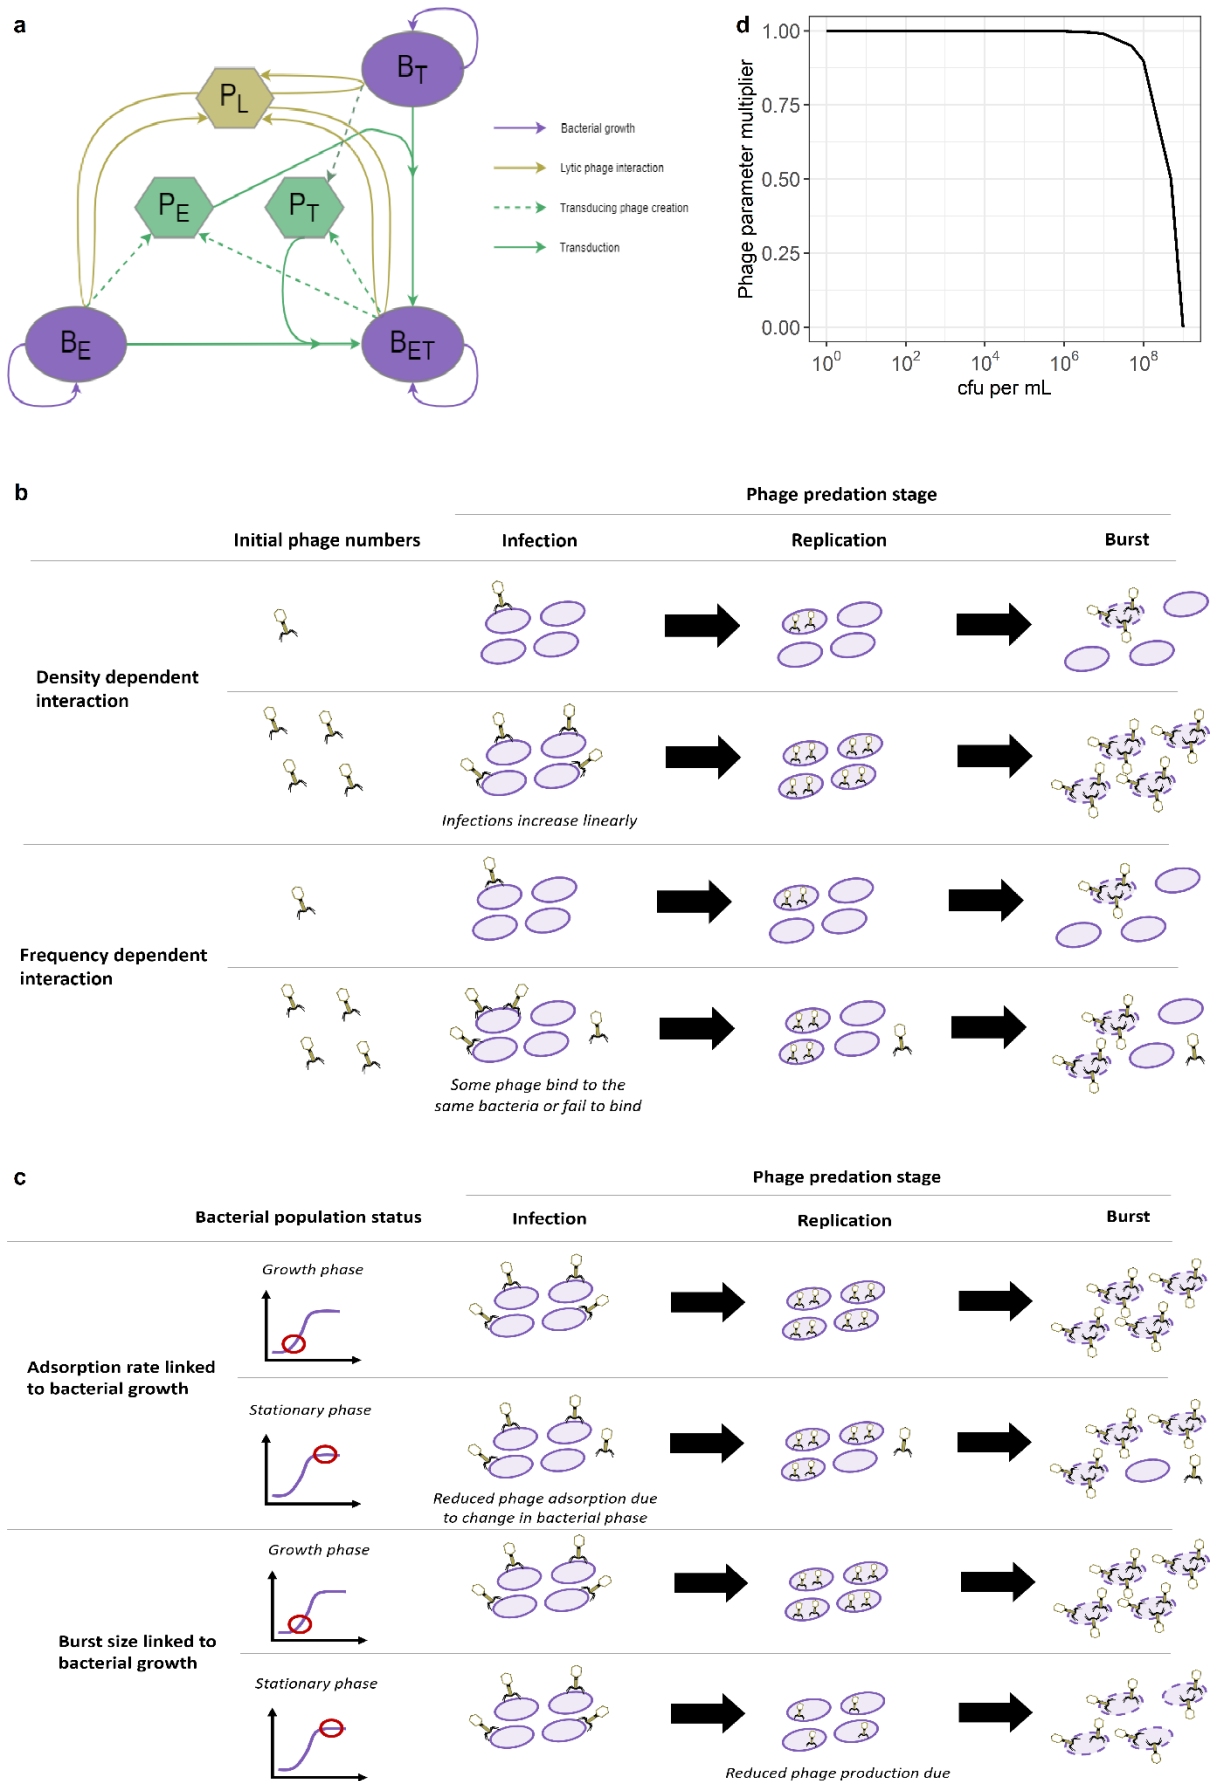

153 **Fig. 3: Phage predation and generalised transduction model diagram, and different phage-bacteria**  
154 **interactions considered. (a) Model diagram.** Each bacteria strain ( $B_E$  resistant to erythromycin,  $B_T$   
155 resistant to tetracycline, or  $B_{ET}$  resistant to both) can replicate (purple). The lytic phage ( $P_L$ ) multiply  
156 by infecting a bacterium and bursting it to release new phage (gold). This process can create  
157 transducing phage ( $P_E$  or  $P_T$ ) carrying a resistance gene (*ermB* or *tetK* respectively) taken from the  
158 infected bacterium (green). These transducing phage can then generate new double resistant progeny  
159 ( $B_{ET}$ ) by infecting the bacteria strain carrying the other resistance gene (green). **(b) Phage predation**  
160 **in the model is either density- or frequency-dependent.** With a density-dependent interaction, the  
161 number of infections scales linearly with the number of phage and bacteria (top). A frequency-  
162 dependent interaction illustrates that some phage may not infect a bacterium, or that multiple phage  
163 may infect the same bacterium (bottom). **(c) Phage predation in the model can decrease as bacterial**  
164 **growth decreases.** A change in bacterial growth phase can affect surface receptors, leading to a  
165 reduced phage adsorption rate (top). Since phage replication relies on bacterial processes, a reduced  
166 bacterial growth can translate into a reduced phage burst size (bottom). **(d) Proposed function linking**  
167 **phage predation parameters to bacterial growth.** This shows the multiplier applied to decrease phage  
168 parameters as the bacterial population increases towards carrying capacity, equivalent to a decrease  
169 in bacterial growth. Here, the carrying capacity is  $2.76 \times 10^9$  colony-forming units (cfu)/mL, estimated  
170 from our data.

171

172 *First phage-bacteria interaction: density versus frequency-dependent phage predation*

173 The most common approach to model phage-bacteria dynamics is to assume that phage predation is  
174 density-dependent<sup>14</sup>. This means that, over one time step, the number of phage infecting bacteria  
175 and the number of bacteria infected by phage are both equal to the product of the number of bacteria  
176 ( $B$ ), phage ( $P$ ), and phage adsorption rate ( $\beta$ ), as shown in equation (1).

177 
$$B * P * \beta \quad (1)$$

178 The density-dependent interaction implies that the number of new infections scales linearly with the  
179 number of phage and bacteria (Fig. 3b). Therefore, even if we keep a constant number of phage,  
180 increasing bacteria numbers always leads to a linear increase in the estimated number of new  
181 infections. Although this simplification is useful and holds for a range of values, it has been suggested  
182 that it is not biologically realistic for small numbers of phage or bacteria, since in reality one phage can  
183 only infect one bacterium over one time step<sup>17</sup>.

184 To overcome these issues, we consider an alternative interaction, where phage predation is  
185 frequency-dependent<sup>33</sup>. This accounts for the fact that one phage does not necessarily always lead to  
186 one infection. For example, phage may sometimes fail to bind to bacteria, or multiple phage may bind  
187 to the same bacterium<sup>32</sup> (Fig. 3b). Importantly, this mathematical interaction guarantees that, at any  
188 given time point, the number of phage infecting bacteria and the number of bacteria infected by phage  
189 can never be greater than the total number of phage or bacteria in the system. Over one time step,  
190 the proportion of phage infecting any bacteria ( $\lambda$ ) is defined by equation (2).

$$191 \quad \lambda = (1 - \exp(-\beta * B)) \quad (2)$$

192 Similarly, the proportion of bacteria being infected by at least one phage ( $\varphi$ ) is calculated with  
193 equation (3).

$$194 \quad \varphi = \left(1 - \exp\left(-\frac{\lambda * P}{B}\right)\right) \quad (3)$$

195 On their own, the density and frequency-dependent interactions shown above cannot reproduce the  
196 equilibriums seen in our experimental data (see Supplementary Information for the equilibrium  
197 analysis). Despite these being common methods to represent phage-bacteria interactions in  
198 mathematical models, previous analyses have suggested that these do not capture the equilibrium  
199 levels we and others have seen<sup>18,34</sup>. Instead, phage-bacteria co-existence may be explained by  
200 variations in phage predation parameters depending on bacterial resources availability, or bacterial

201 growth rate<sup>14,17–22</sup>. However, to the best of our knowledge a simple mathematical expression linking  
202 phage predation to bacterial growth has not yet been developed.

203

#### 204 *Second phage-bacteria interaction: dependence of phage predation on bacterial growth*

205 Here, we consider that a decrease in bacterial growth as bacteria reach stationary phase could firstly  
206 affect the phage adsorption rate  $\beta$ , due to changes in receptors on bacterial surfaces, which affect  
207 opportunities for phage to bind (Fig. 3c). Secondly, this could affect phage production, and thus burst  
208 size  $\delta$ , as phage replication relies on bacterial processes and may decrease when bacterial growth  
209 slows down (Fig. 3c). Using a single phage predation multiplier, with the same principle of logistic  
210 growth applied to bacteria, we allow either or both  $\beta$  and  $\delta$  to decrease as bacterial growth decreases  
211 in our model (equations (4) and (5)).

$$212 \quad \beta = \beta_{max} * \left(1 - \frac{B}{B_{max}}\right) \quad (4)$$

$$213 \quad \delta = \delta_{max} * \left(1 - \frac{B}{B_{max}}\right) \quad (5)$$

214 These equations imply that, as bacterial population size increases towards carrying capacity ( $B_{max}$ ),  
215 phage parameters will be reduced (Fig. 3d).

216

### 217 **Identification of the best-fitting phage-bacteria interactions to** 218 **reproduce the *in vitro* dynamics**

219 Overall, we considered 6 different models, either density- or frequency-dependent, and with either or  
220 both the phage adsorption rate and burst size linked to bacterial growth. Note that we did not include

221 a phage decay rate in these models, as this did not affect the dynamics of the system over 24h, for a  
222 wide range of decay rates (Supplementary Fig. 3).

223 We used a Bayesian methodology to fit the models simultaneously to the lytic phage and double-  
224 resistant progeny numbers from the transduction co-culture datasets with starting phage  
225 concentrations of  $10^3$  and  $10^5$  pfu/mL (Fig. 2), and tested whether the estimated parameters could  
226 reproduce the dynamics seen with the starting phage concentration of  $10^4$  pfu/mL.

227 All models successfully reproduced the trends seen *in vitro* when the phage were started at either  $10^3$   
228 and  $10^4$  pfu/mL (Fig. 4a-b). However, only the two models where only phage burst size decreases as  
229 the bacteria population approaches carrying capacity were able to reproduce the increase in phage  
230 numbers seen in the later hours of the  $10^5$  pfu/mL dataset, despite all models having been fitted to  
231 this dataset (Fig. 4a-b). This was confirmed by calculating the average Deviance Information Criteria  
232 (DIC) value for the models, which favours best-fitting models while penalising more complex models  
233 (i.e. with more parameters)<sup>35</sup>. The two models where only phage burst size decreases as the bacteria  
234 population approaches carrying capacity had the lowest DIC values, indicating that they were the  
235 better-fitting models (Table 1).

236 Our initial experiments considered the dynamics over 24h for varying phage starting concentrations.  
237 To test the ability of our model to recreate the dynamics under changing bacterial levels, we replicated  
238 our transduction co-culture experiments with starting concentrations of  $10^6$  cfu/mL bacteria instead  
239 of  $10^4$  cfu/mL, varying the starting phage concentration between  $10^4$  and  $10^6$  pfu/mL, and measuring  
240 bacteria and phage numbers after 24h of co-culture. We then used the estimated parameter values  
241 (Table 1) to try to reproduce these 24h numbers of bacteria and phage.

242 Increasing the starting phage concentration led to an increase in the number of phage after 24h (Fig.  
243 4c). For a starting phage concentration between  $10^4$  and  $10^6$  pfu/mL, increasing starting phage  
244 numbers did not affect single-resistant parents  $B_E$  and  $B_T$  numbers after 24h, but led to a progressive

245 increase in double-resistant progeny  $B_{ET}$  numbers. Increasing starting phage numbers above  $10^6$   
 246 pfu/mL caused bacteria numbers after 24h to decrease.

247 Using the estimated parameter values (Table 1) with the model where only burst size is linked to  
 248 bacterial growth, we see that the density model cannot reproduce these dynamics as it predicts that  
 249 bacteria become extinct rapidly (Fig. 4c). The frequency-dependent model is able to reproduce these  
 250 trends, but fails to recreate the exact same numbers of phage and bacteria, predicting a decline in  
 251 bacterial levels when the starting phage concentration increases above  $10^5$  pfu/mL, a lower threshold  
 252 than seen in the data (Fig. 4c). The same overall trends are seen for the models where only the  
 253 adsorption rate is linked to bacterial growth, or both adsorption rate and burst size (Supplementary  
 254 Fig. 4).

255

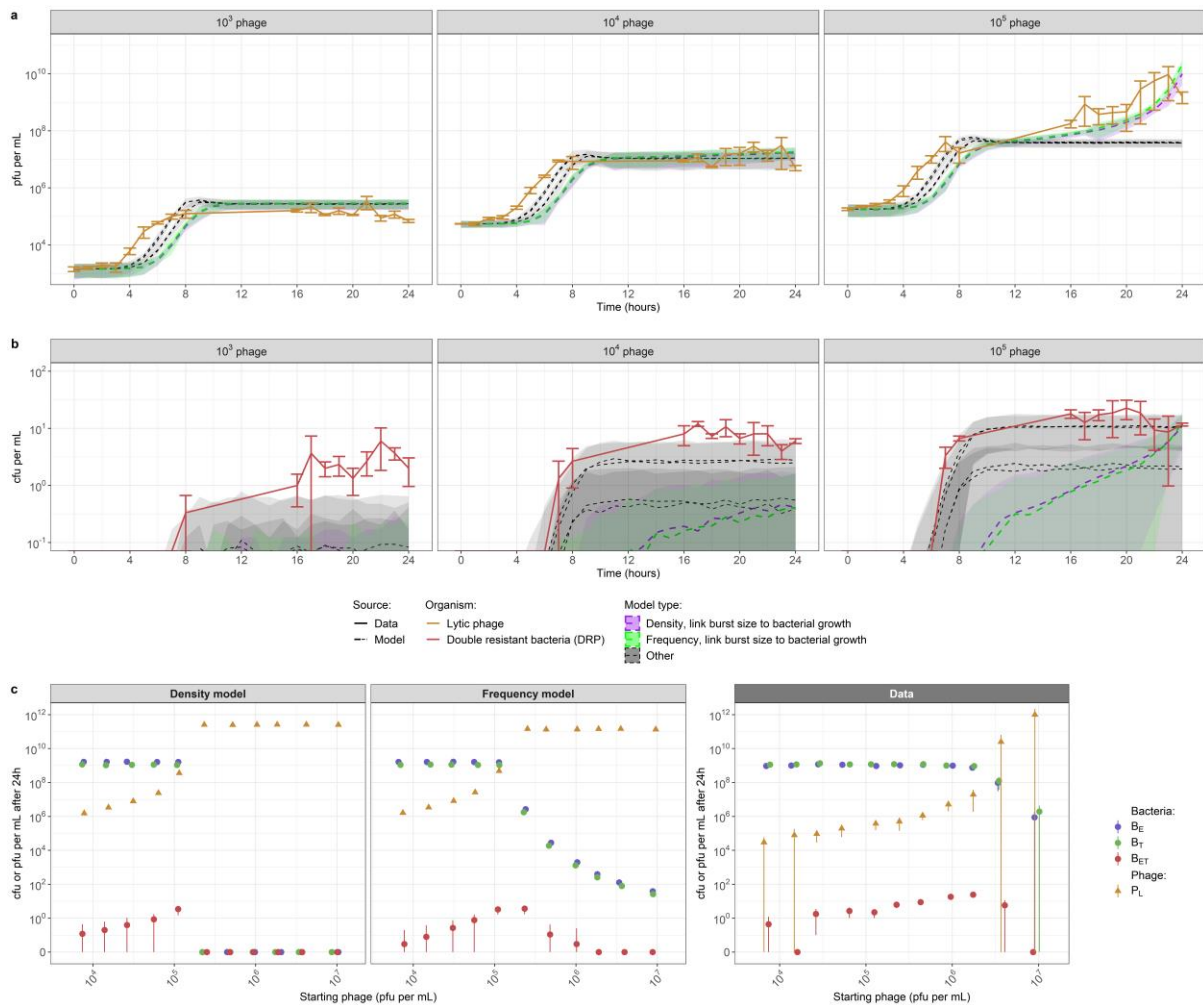

256

257 **Fig. 4: Accuracy of the best-fitted models to reproduce *in vitro* phage-bacteria dynamics. (a-b) The**  
258 **models with only phage burst size linked to bacterial growth are the most accurate to reproduce *in***  
259 ***vitro* trends in lytic phage (a) and double resistant bacteria (b) numbers, starting from a bacteria**  
260 **concentration of  $10^4$  cfu/mL and varying phage concentrations.** All models (dashed lines) can  
261 reproduce the trends seen *in vitro* when phage are started at  $10^3$  or  $10^4$  pfu/mL (data in solid lines),  
262 but only the models with just the phage burst size linked to bacterial growth (coloured model output)  
263 can reproduce the trend seen when phage are started at  $10^5$  pfu/mL. Other models (grey) either only  
264 have the phage adsorption rate linked to bacterial growth, or both the phage adsorption rate and  
265 burst size. Models are fitted to the  $10^3$  and  $10^5$  data, and tested with the  $10^4$  data. Parameter values  
266 used are the median fitted values (Table 1). Shaded areas indicate standard deviation generated from  
267 Poisson resampling of model results. Error bars for the data (solid lines) indicate mean +/- standard  
268 error, from 3 experimental replicates. **(c) When further testing fitted model dynamics starting from**  
269  **$10^6$  cfu/mL bacteria and varying phage concentrations, the density-dependent model incorrectly**  
270 **predicts bacterial extinction, while the frequency-dependent model reproduces the trend, but not**  
271 **the exact values of the 24h data.** In the co-culture used to generate the data, each single-resistant  
272 parent strain ( $B_E$  and  $B_T$ ) is added at a starting concentration of  $10^6$  cfu/mL, and no double-resistant  
273 progeny ( $B_{ET}$ ) are initially present. The starting concentration of lytic phage ( $P_L$ ) varies (x axis). Points  
274 indicate mean results, and are each slightly shifted horizontally to facilitate viewing. Error bars indicate  
275 either mean +/- standard deviation for the models (left/centre panels), or mean +/- standard error for  
276 the data (right panel). Parameter values used are the median fitted values (Table 1).



**Table 1: Estimated parameter values from fitting to *in vitro* data.** Values show median and 95% credible intervals for posterior distributions. Parameter units are indicated in parentheses. Fitting was performed using the Markov chain Monte Carlo Metropolis–Hastings algorithm and the data from the co-culture with a starting bacterial concentration of  $10^4$  cfu/ml and phage concentration of  $10^3$  and  $10^5$  pfu/ml. DIC: Deviance Information Criteria. A smaller DIC indicates better model fit. DIC values are relative to the smallest DIC calculated, which is for the frequency-dependent model with only burst size linked to bacterial growth (line 5, parameters in bold).

| Interaction type    | Adsorption rate linked to growth | Burst size linked to growth | Adsorption rate $\beta$ (phage <sup>-1</sup> bacteria <sup>-1</sup> hour <sup>-1</sup> )                      | Burst size $\delta$ (phage) | Transducing phage proportion $\alpha$ (proportion of burst size)                                           | Phage latent period $\tau$ (hour) | DIC      |
|---------------------|----------------------------------|-----------------------------|---------------------------------------------------------------------------------------------------------------|-----------------------------|------------------------------------------------------------------------------------------------------------|-----------------------------------|----------|
| Density dependent   | Yes                              | No                          | $4.5 \times 10^{-9}$ ( $4.1 \times 10^{-9}$ ; $5.0 \times 10^{-9}$ )                                          | 12 (10 ; 14)                | $3.1 \times 10^{-8}$ ( $1.5 \times 10^{-8}$ ; $5.8 \times 10^{-8}$ )                                       | 0.64 (0.55 ; 0.73)                | 610      |
|                     | No                               | Yes                         | $1.6 \times 10^{-10}$ ( $1.5 \times 10^{-10}$ ; $1.7 \times 10^{-10}$ )                                       | 79 (72 ; 86)                | $1.4 \times 10^{-8}$ ( $1.1 \times 10^{-8}$ ; $1.7 \times 10^{-8}$ )                                       | 0.65 (0.62 ; 0.69)                | 63       |
|                     | Yes                              | Yes                         | $4.3 \times 10^{-9}$ ( $3.9 \times 10^{-9}$ ; $4.6 \times 10^{-9}$ )                                          | 43 (37 ; 49)                | $1.2 \times 10^{-8}$ ( $6.4 \times 10^{-9}$ ; $2.3 \times 10^{-8}$ )                                       | 0.93 (0.86 ; 0.99)                | 298      |
| Frequency dependent | Yes                              | No                          | $5.1 \times 10^{-9}$ ( $3.7 \times 10^{-9}$ ; $6.7 \times 10^{-9}$ )                                          | 10 (8 ; 12)                 | $3.1 \times 10^{-7}$ ( $2.3 \times 10^{-7}$ ; $4.3 \times 10^{-7}$ )                                       | 0.60 (0.50 ; 0.69)                | 680      |
|                     | No                               | Yes                         | <b><math>2.3 \times 10^{-10}</math> (<math>2.1 \times 10^{-10}</math> ; <math>2.4 \times 10^{-10}</math>)</b> | <b>76 (70 ; 83)</b>         | <b><math>1.0 \times 10^{-8}</math> (<math>8.5 \times 10^{-9}</math> ; <math>1.4 \times 10^{-8}</math>)</b> | <b>0.72 (0.69 ; 0.77)</b>         | <b>0</b> |
|                     | Yes                              | Yes                         | $4.7 \times 10^{-9}$ ( $3.8 \times 10^{-9}$ ; $5.8 \times 10^{-9}$ )                                          | 31 (26 ; 37)                | $1.7 \times 10^{-7}$ ( $1.3 \times 10^{-7}$ ; $2.1 \times 10^{-7}$ )                                       | 0.88 (0.79 ; 0.96)                | 370      |

## 1 **Analysis of phage predation and transduction dynamics**

2 Parameter estimates for our best-fitting model (with a frequency-dependent interaction and a link  
3 between phage burst size and bacterial growth only) suggest that the adsorption rate is  $2.3 \times 10^{-10}$   
4 (95% credible interval:  $2.1 \times 10^{-10}$  -  $2.4 \times 10^{-10}$ ) which is the smallest estimate from the models (Table  
5 1). On the other hand, the estimated burst size is relatively large at 76 (70 - 83) phage, and is higher  
6 than a previous *in vitro* estimate for  $80\alpha$  of 40<sup>36</sup>. However, due to the decrease in burst size when  
7 bacteria are in stationary phase, we expect that this number would change depending on the  
8 conditions under which it is measured (Fig. 5a). Finally, the estimated latent period of 0.72h (0.69 -  
9 0.77) is slightly longer than a previous *in vitro* estimate of 0.67h<sup>36</sup>. Regarding the other models, we  
10 note some biologically unlikely parameter estimates which further suggest that these models are  
11 inappropriate, such as the low burst size for the models with only the adsorption rate linked to  
12 bacterial growth (12 (10 - 14) and 10 (8 - 12)), or the high latent period for the models with both  
13 adsorption rate and burst size linked to bacterial growth (0.93 (0.86 - 0.99) and 0.88 (0.79 - 0.96))  
14 (Table 1).

15 We used our best-fitting model to reproduce our *in vitro* data (Fig. 2) and uncover the underlying  
16 phage-bacteria dynamics. Due to the link between phage burst size and bacterial growth, burst size  
17 decreases as bacteria reach carrying capacity after 8h (Fig. 5a-b). This is reflected in the relative change  
18 in phage numbers, which tends towards 0 after 8h (Fig. 5b). After this point, phage incidence remains  
19 stable for the  $10^3$  and  $10^4$  pfu/mL dataset, but starts increasing again significantly after 20h for the  $10^5$   
20 pfu/mL dataset as bacteria numbers start decreasing due to phage predation, allowing burst size to  
21 increase again (Fig. 5a-c).

22 We estimate that for every  $10^8$  new lytic phage released during burst, there was approximately one  
23 transducing phage carrying an antibiotic resistance gene (Table 1, Fig. 5c). Note that new double-  
24 resistant progeny (DRP) can either be generated by transduction, or by replication of already existing  
25 DRP. Using the model, we found that DRP were always predominantly generated by transduction

1 rather than by growth (Fig. 5d). This is because DRP only appear after 2 to 4h, while after 4h bacterial  
 2 growth rate starts decreasing as the total bacteria population approaches carrying capacity (Fig.  
 3 5b&d).

4

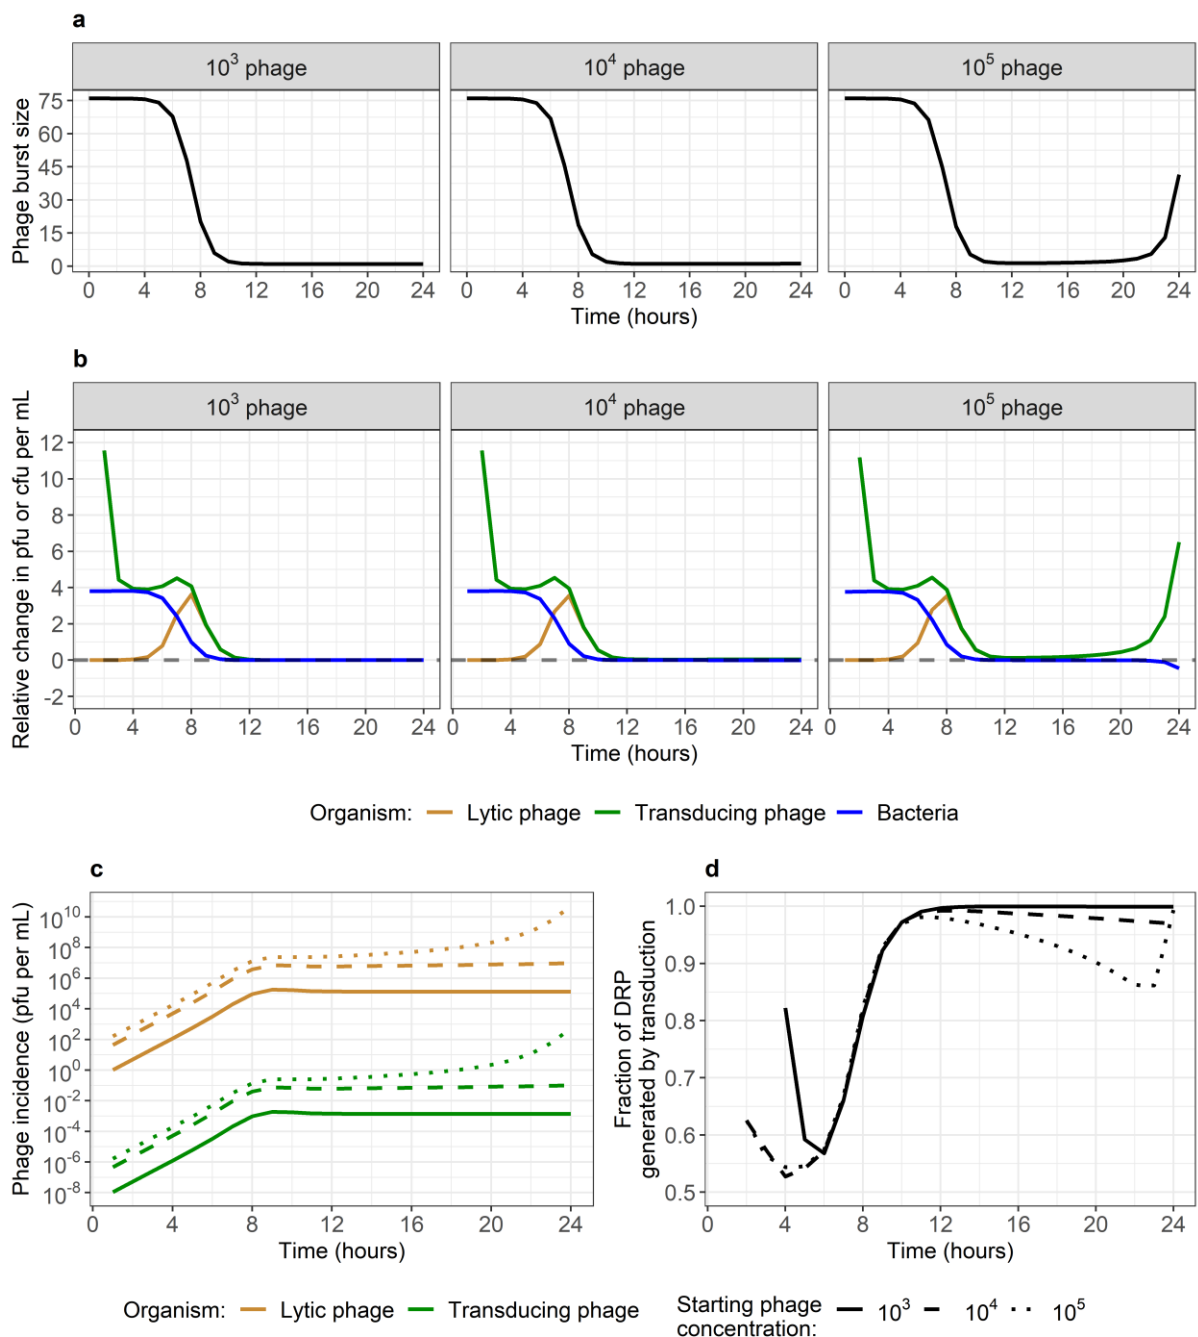

5

6 **Fig. 5: Underlying phage and bacteria dynamics generated by the best-fitting frequency-dependent**  
 7 **model with burst size linked to bacterial growth.** Model parameters are the median estimates from

1 model fitting (Table 1). **(a) Phage burst size over time, by starting phage concentration.** As bacteria  
2 reach stationary phase after 8h, phage burst size decreases. In the  $10^5$  dataset, we see that burst size  
3 is predicted to increase again after 20h. This is due to bacterial numbers decreasing as bacteria are  
4 being lysed by phage. **(b) Relative change in phage and bacteria numbers over time, by starting  
5 phage concentration.** The number of new phage generated at each time step increases (positive  
6 value) until bacteria reach stationary phase around 8h. This applies to lytic and transducing phage. In  
7 the  $10^5$  dataset, phage keep increasing after 10h, eventually causing a decrease in bacterial numbers  
8 (negative value), which translates into a further acceleration in the increase in phage numbers due to  
9 the increased burst size (Fig. 5a). After 8h, the relative changes in lytic and transducing phage numbers  
10 are identical. **(c) Incidence of lytic (gold) and transducing (green) phage over time, by starting phage  
11 concentration (linetype).** For any dataset and time-point, there is approximately 1 new transducing  
12 phage generated for each  $10^8$  new lytic phage. **(d) Fraction of double-resistant progeny (DRP)  
13 generated by transduction each hour over time, by starting phage concentration (linetype).** DRP  
14 generation always occurs predominantly by transduction, rather than by growth of already existing  
15 DRP. Note that the time at which DRP are first generated varies by starting phage concentration.

# 1 Discussion

2 We observed rapid *in vitro* horizontal gene transfer of antimicrobial resistance (AMR) by generalised  
3 transduction in *Staphylococcus aureus*, alongside equilibriums in phage and bacteria numbers which  
4 varied depending on the starting number of phage. The most accurate mathematical model to  
5 replicate phage-bacteria dynamics, including generalised transduction, represented phage predation  
6 as a frequency-dependent interaction, and linked phage burst size to bacterial growth. To the best of  
7 our knowledge, these two elements have both been suggested previously<sup>17,18,33</sup>, yet never combined.

8 Density-dependent models have been compared to data at less fine time scales (e.g. daily time points)  
9 or over smaller time periods (e.g. less than 8h), where they were able to reproduce *in vitro* values  
10 from experiments in chemostats, and have been helpful to improve our basic understanding of phage-  
11 bacteria dynamics<sup>14-16</sup>. However, here we show that this type of interaction is not able to reproduce  
12 finer hourly dynamics, and does not perform consistently when varying concentrations of starting  
13 phage and bacteria. Using this, alongside a critique of the mathematical implications of this process,  
14 we argue that density-dependence is not a biologically accurate representation of phage predation,  
15 as it fails to reproduce these dynamics at high or low numbers of phage and bacteria, which would  
16 correspond to scenarios potentially seen during phage therapy.

17 Our work adds to the growing body of evidence that phage predation depends on bacterial growth  
18<sup>14,17-23</sup>. This has implications for antibiotic-phage combination therapy, as it suggests that  
19 bacteriostatic antibiotics, which prevent bacterial growth, could reduce phage predation. This effect  
20 has been previously seen in *S. aureus*<sup>37</sup>.

21 Our experimental design is both a strength and a limitation of our study. Since we jointly designed the  
22 experiments and models, we are confident that we have included in our mathematical model all the  
23 organisms and interactions present *in vitro*. We are therefore confident in the conclusions on model  
24 structure, however, the usage of such a specific experimental system with two bacterial strains of the

1 same genetic background and one phage limits the generalisability of our parameter values, as these  
2 will likely vary for different bacteria and phage. Growth conditions will likely also differ between the  
3 *in vitro* environment studied here, and *in vivo* conditions. Here, our model assumes that phage do not  
4 decay, that bacteria do not become resistant to phage, and that they can grow indefinitely as they are  
5 observed in a rich medium for 24h only, but over longer periods of time it may be necessary to revisit  
6 these assumptions<sup>38</sup>. Finally, we assumed that the proportion of transducing phage created was  
7 independent of the gene being transduced (*ermB*, on the bacterial chromosome, or *tetK*, on a  
8 plasmid). This was supported by preliminary work (not shown), but should be further investigated to  
9 improve our understanding of the factors that can facilitate or prevent transduction of different genes.  
10 To answer all of these questions, future work should investigate both phage predation and  
11 transduction dynamics over longer time periods, with different strains of bacteria and phage.

12 All our models captured certain aspects of the trends seen *in vitro*, but also underestimated phage  
13 numbers between 5-7h by up to 20 times. This is likely a consequence of our experimental design. To  
14 count lytic phage, we centrifuged and filtered the co-culture to remove bacteria. This could have  
15 caused the premature burst of some phage-infected bacteria, artificially increasing the numbers of  
16 phage we then counted<sup>39</sup>. Since the period between 5-7h is when phage infections are highest (Fig.  
17 5b), this is why we would see such a large discrepancy at this stage. We also note that the models with  
18 only phage burst size linked to bacterial growth underestimated the number of double-resistant  
19 progeny (DRP). This small difference (up to 10 cfu/mL) is likely due to our choice of using a  
20 deterministic model. This type of model is useful for our purpose of fitting to *in vitro* data and analysing  
21 the underlying dynamics here, but mathematically allows for fractions of bacteria to exist, instead of  
22 just whole numbers. Future analyses using a stochastic model would better capture random effects,  
23 which can have an important impact at low numbers.

24 Multiplicity of infection (MOI, starting ratio of phage to bacteria) is a commonly used metric to present  
25 results of experiments with these organisms<sup>32</sup>. With a starting concentration of  $10^4$  bacteria per mL,  
26 we were able to fit our model to the dynamics for two MOI (0.1 and 10), and replicate those of a third

1 (1). However, when trying to use the same model for these same three MOI, but with a starting  
2 bacterial concentration to  $10^6$ , we found differences between our model and values seen after 24h.  
3 This indicates that MOI is not appropriate to summarise all the complexity of the underlying phage-  
4 bacteria dynamics. Future experimental studies should express their results as a function of their  
5 starting concentration of phage and bacteria, not just MOI.

6 In any case, the failure of our model to replicate 24h values with a different starting bacteria  
7 concentrations shows that, whilst we have reduced the model structure uncertainty, we are still not  
8 fully capturing the phage-bacteria interaction. Currently, our model predicts that, for a starting  
9 concentration of  $10^6$  bacteria, a starting concentration of  $10^5$  phage or more will be enough to cause  
10 a decrease in bacterial numbers after 24h, while our data shows that the starting concentration of  
11 phage must be higher than  $10^6$  for this to happen. *In vitro*, it is likely that slower bacterial growth  
12 simultaneously affects the phage adsorption rate, latent period and burst size, each to varying extents  
13 <sup>14,17-23</sup>. This would explain why we would need a higher starting concentration of phage for a higher  
14 starting concentration of bacteria, to exert a strong enough predation pressure before bacteria reach  
15 stationary phase, causing a reduction in phage predation. However, here we have only made the first  
16 step in this process, having linked the burst size linearly to the bacterial growth rate, instead of trying  
17 to link different phage predation parameters to bacterial growth using different functions. These  
18 complexities need to be explored further, supported by *in vitro* work measuring phage predation  
19 parameters at various time points.

20 Despite being recognised as a major mechanism of horizontal gene transfer, thus far there have been  
21 limited mathematical modelling studies on the dynamics of transduction of AMR <sup>13</sup>. Using our model,  
22 we are able to estimate numbers of transducing phage which we cannot count *in vitro*, and see that  
23 approximately 1 generalised transducing phage is generated per  $10^8$  lytic phage, consistent with  
24 previous estimates <sup>40,41</sup>. Here, we show that this number, which may seem insignificant, is enough to  
25 consistently lead to the successful horizontal gene transfer of AMR, resulting in DRP after only 7h,  
26 substantially less than the usual duration of antibiotic treatment. We also show that transduction is

1 the dominant mechanism to create new DRP throughout the entire experiment, rather than growth  
2 of existing DRP. This echoes the conclusions of previously published work on the importance of  
3 transduction, including *in vivo* experiments and with other *Staphylococcus* species<sup>6,7,29,42</sup>.

4 Our findings suggest that transduction is currently under-emphasised in the exploration of phage-  
5 bacteria dynamics. Future studies on this topic should not assume that transduction can be dismissed  
6 by default, but instead investigate whether it is relevant in their system. This requires further *in vitro*  
7 and *in vivo* monitoring to identify scenarios where transduction plays a significant role in the transfer  
8 of AMR genes, likely depending on the environment, and characteristics of the bacteria and phage  
9 present. This will require new experimental designs, since counting phage numbers can be difficult,  
10 notably with clinical strains of bacteria. This should also be investigated in the presence of antibiotics,  
11 where the importance of selection enters, increasing the fitness of the small numbers of DRP  
12 generated by transduction.

13 In conclusion, the dual nature of phage (predation and transduction) leads to complex interactions  
14 with bacteria. These dynamics must be clarified, to correctly evaluate the extent to which phage  
15 contribute to the global spread of AMR. We must also understand this dual nature to guarantee a safe  
16 design of phage therapy. Otherwise, ignoring transduction may lead to worse health outcomes in  
17 patients if phage contribute to spreading AMR instead of overcoming it. Interdisciplinary work will be  
18 essential to answer these urgent public health questions in the near future.



# 1 **Methods**

2 All analyses were conducted in R<sup>43</sup>. The underlying code and data are available in a GitHub repository:  
3 [https://github.com/gleclerc/mrsa\\_phage\\_dynamics](https://github.com/gleclerc/mrsa_phage_dynamics).

## 4 **Experimental methods**

### 5 *Strains and phage used*

6 The *Staphylococcus aureus* parent strains used for our transduction experiment were obtained from  
7 the Nebraska Transposon Mutant Library<sup>44</sup>. These were strain NE327, carrying the *ermB* gene  
8 encoding erythromycin resistance and knocking out the  $\phi 3$  integrase gene, and strain NE201KT7, a  
9 modified NE201 strain with a kanamycin resistance cassette instead of the *ermB* gene knocking out  
10 the  $\phi 2$  integrase gene, and a pT181 plasmid carrying the *tetK* gene encoding tetracycline resistance<sup>45</sup>.  
11 Growing these strains together in identical conditions as our co-culture below, but without the  
12 addition of exogenous phage, does not lead to detectable horizontal gene transfer (HGT; data not  
13 shown). To enable HGT, exogenous 80 $\alpha$  phage was used, a well-characterised lytic phage of *S. aureus*  
14 capable of generalised transduction<sup>46</sup>. To count lytic phage, *S. aureus* strain RN4220 was used, a  
15 restriction deficient strain highly susceptible to phage infection<sup>47</sup>.

16

### 17 *Transduction co-culture protocol*

18 Pre-cultures of NE327 and NE201KT7 were prepared separately in 50mL conical tubes with 10mL of  
19 Brain Heart Infusion Broth (BHIB, Sigma, UK), and incubated overnight in a shaking water bath (37°C,  
20 90rpm). The optical densities of the pre-cultures were checked at 625nm the next day to confirm  
21 growth. The pre-cultures were diluted in phosphate-buffered saline (PBS), and added to a glass bottle  
22 of fresh BHIB to reach the desired starting concentration in colony forming units per mL (cfu/mL) for

1 each strain, forming a master mix for the co-culture.  $\text{CaCl}_2$  was added at a concentration of 10mM to  
2 the master mix. Phage 80 $\alpha$  stock was diluted in phage buffer, and added to the master mix to reach  
3 the desired starting concentration in plaque forming units per mL (pfu/mL). Ten 50mL conical tubes  
4 were prepared (one co-culture tube for each timepoint, from 0 to 8h and 16 to 24h), each with 10mL  
5 from the master mix. Each co-culture tube was then incubated in a shaking water bath (37°C, 90rpm)  
6 for the corresponding duration.

7 Bacteria counts for each timepoint were obtained by diluting the co-culture in PBS before plating 50 $\mu\text{L}$   
8 on selective agar, either plain Brain Heart Infusion Agar (BHIA, Sigma, UK), BHIA with erythromycin  
9 (Sigma, UK) at 10mg/L, BHIA with tetracycline (Sigma, UK) at 5mg/L, or BHIA with both erythromycin  
10 and tetracycline (10mg/L and 5mg/L respectfully). Note we plated 500 $\mu\text{L}$  instead of 50 on the plates  
11 with both antibiotics, to increase the sensitivity of the assay. This allowed distinction between each  
12 parent strain, resistant to either erythromycin or tetracycline, and the double resistant progeny (DRP)  
13 generated by transduction. Plates were then incubated at 37°C for 24h, or 48h for plates containing  
14 both antibiotics. Colonies were counted on the plates to derive the cfu/mL in the co-culture for that  
15 timepoint. Colonies on the double antibiotic plates were screened using polymerase chain reaction to  
16 confirm that they contained both resistance genes *ermB* and *tetK*, and had not instead gained  
17 resistance to either antibiotic by mutation (Supplementary Fig. 5).

18 Lytic phage counts for each timepoint were obtained using the agar overlay technique<sup>48</sup>. Briefly, the  
19 co-culture was centrifuged at 4000rpm for 15 minutes, filtered twice with 10 $\mu\text{m}$  filters, and diluted in  
20 Nutrient Broth No. 2 (NB2, ThermoFisher Scientific, UK). 15mL conical tubes were prepared with 300 $\mu\text{L}$   
21 of RN4220 grown overnight in NB2, and  $\text{CaCl}_2$  at a concentration of 10mM. 200 $\mu\text{L}$  of diluted phage  
22 were added, and the tubes were left to rest on the bench for 30 minutes. The contents of the tubes  
23 were then mixed with 7mL of phage top agar, and poured on phage agar plates. Phage agar was  
24 prepared using NB2, supplemented with agar (Sigma, UK) at 3.5g/L for top agar and 7g/L for plates.

1 The plates were incubated overnight at 37°C. Clear spots in the bacterial lawn were counted to derive  
2 the pfu/mL in the co-culture for that timepoint.

### 3 *Growth co-culture protocol*

4 To estimate the growth rate of bacteria in the absence of exogenous phage, another experiment was  
5 conducted following the same methodology as described above, but without the addition of 80α, and  
6 starting the three strains (NE327, NE201KT7 and DRP) at a concentration of 10<sup>4</sup> cfu/mL. The relative  
7 fitnesses *W* of the strains were calculated using equation (6).

$$8 \quad W = \frac{\ln\left[\frac{S1(24)}{S1(0)}\right]}{\ln\left[\frac{S2(24)}{S2(0)}\right]} \quad (6)$$

9 Where *S1(t)* and *S2(t)* represent the number of bacteria (in cfu/mL) from the chosen strains 1 and 2,  
10 at times *t* = 0 or 24 hours.

11

## 12 **Mathematical modelling methods**

### 13 *General model structure*

14 We designed a deterministic, compartmental model to replicate our experimental conditions. We  
15 included 6 populations: *B<sub>E</sub>* (corresponding to ery-resistant NE327), *B<sub>T</sub>* (tet-resistant NE201KT7), *B<sub>ET</sub>*  
16 (double resistant progeny, DRP), *P<sub>L</sub>* (lytic phage), *P<sub>E</sub>* (phage transducing *ermB*) and *P<sub>T</sub>* (phage  
17 transducing *tetK*). Their interactions are represented in Fig. 2.

18 Bacteria from each strain *θ* (*θ* ∈ {E, T, ET}) can multiply at each time step *t* following logistic growth at  
19 rate *μ<sub>θ</sub>*, with a maximum value *μ<sub>maxθ</sub>* which declines as the total bacteria population *N* (= *B<sub>E</sub>* + *B<sub>T</sub>* + *B<sub>ET</sub>*)  
20 approaches carrying capacity *N<sub>max</sub>*.

$$21 \quad \mu_{\theta} = \mu_{max_{\theta}} * \left(1 - \frac{N}{N_{max}}\right) \quad (7)$$

1 At each time step  $t$ , a proportion  $\lambda$  of lytic phage ( $P_L$ ) infect a number of bacteria ( $\varphi_L$ ), replicate, and  
 2 burst out from the bacteria with a burst size  $\delta + 1$  after a latent period  $\tau$ . During phage replication, a  
 3 proportion  $\alpha$  of new phage are transducing phage. The nature of the transducing phage ( $P_E$  or  $P_T$ )  
 4 depends on the bacteria being infected (e.g.  $B_E$  bacteria can only lead to  $P_E$  phage). Then, a proportion  
 5  $\lambda$  of these transducing phage ( $P_E$  or  $P_T$ ) infect a number of bacteria ( $\varphi_E$  or  $\varphi_T$ ). If they successfully infect  
 6 a bacterium carrying the other resistance gene (e.g.  $P_E$  phage infecting a  $B_T$  bacterium), this creates  
 7 double resistant progeny ( $B_{ET}$ ). The complete model equations can be found below.

$$8 \quad \frac{dB_E}{dt} = \mu_E * (B_E - \omega * \left( (\varphi_L + \varphi_T) * \frac{B_E}{N} \right)) - (\varphi_L + \varphi_T) * \frac{B_E}{N} \quad (8)$$

9 *{Change in  $B_E$  = growth of  $B_E$  – infections by  $P_L$  – infections by  $P_T$ }*

$$10 \quad \frac{dB_T}{dt} = \mu_T * (B_T - \omega * \left( (\varphi_L + \varphi_E) * \frac{B_T}{N} \right)) - (\varphi_L + \varphi_E) * \frac{B_T}{N} \quad (9)$$

11 *{Change in  $B_T$  = growth of  $B_T$  – infections by  $P_L$  – infections by  $P_E$ }*

$$12 \quad \frac{dB_{ET}}{dt} = \mu_{ET} * (B_{ET} - \omega * \left( \varphi_L * \frac{B_{ET}}{N} \right)) - \varphi_L * \frac{B_{ET}}{N} + \varphi_E * \frac{B_T}{N} + \varphi_T * \frac{B_E}{N} \quad (10)$$

13 *{Change in  $B_{ET}$  = growth of  $B_{ET}$  – infections by  $P_L$  + infections of  $B_T$  by  $P_E$  + infections of  $B_E$  by  $P_T$ }*

$$14 \quad \frac{dP_L}{dt} = \varphi_L(t - \tau) * \delta * \left( 1 - \alpha * \frac{B_E + B_T + 2 * B_{ET}}{N} \right) - \lambda * P_L \quad (11)$$

15 *{Change in  $P_L$  = new  $P_L$  phage –  $P_L$  phage infecting bacteria}*

$$16 \quad \frac{dP_E}{dt} = \varphi_L(t - \tau) * \delta * \alpha * \frac{B_E + B_{ET}}{N} - \lambda * P_E \quad (12)$$

17 *{Change in  $P_E$  = new  $P_E$  phage –  $P_E$  phage infecting bacteria}*

$$18 \quad \frac{dP_T}{dt} = \varphi_L(t - \tau) * \delta * \alpha * \frac{B_T + B_{ET}}{N} - \lambda * P_T \quad (13)$$

19 *{Change in  $P_T$  = new  $P_T$  phage –  $P_T$  phage infecting bacteria}*

1 Some parameters ( $\tau$ ,  $\alpha$ ,  $\omega$ ) are constant, while others ( $\mu_E$ ,  $\mu_T$ ,  $\mu_{ET}$ ,  $\beta$ ,  $\varphi_L$ ,  $\varphi_E$ ,  $\varphi_T$ ,  $\delta$ ) can change at each  
2 time step and depending on the specified interaction mechanism. Note that  $\omega$  is a special parameter  
3 equal to 0 if the model is density-dependent, or 1 if it is frequency-dependent.

4

#### 5 *Density-dependent interaction*

6 Over one time step, both the number of phage infecting bacteria and the number of bacteria infected  
7 by phage are equal to the product of the number of phage, bacteria, and phage adsorption rate. In  
8 our equations for density-dependence, given the phage adsorption rate  $\beta$ , the proportion  $\lambda$  of phage  
9 that infect any bacteria is:

$$10 \quad \lambda = \beta * N \quad (14)$$

11 And the number of bacteria infected by a phage  $\theta$  ( $\theta \in \{L, E, T\}$ ) is:

$$12 \quad \varphi_{\theta} = \lambda * P_{\theta} \quad (15)$$

13 Note that the parameter  $\omega$  is set to 0 in this case.

14

#### 15 *Frequency-dependent interaction*

16 Using this interaction prevents the number of phage infecting bacteria over one time step to be higher  
17 than the total number of phage in the system (and the number of bacteria being infected one time  
18 step to be higher than the total number of bacteria in the system). Equations (14) and (15) then  
19 become:

$$20 \quad \lambda = (1 - \exp(-\beta * N)) \quad (16)$$

$$21 \quad \varphi_{\theta} = \left(1 - \exp\left(-\lambda * \frac{P_{\theta}}{N}\right)\right) * N \quad (17)$$

1 With the frequency-dependent interaction, we set the parameter  $\omega$  to 1. This ensures that, over one  
2 time step and for any bacterium, phage infection and bacteria replication are mutually exclusive  
3 events. Without this modification, phage infections would not be able to reduce bacterial population  
4 size due to mathematical constraints (see Supplementary Information).

5

### 6 *Link between bacterial growth and phage predation*

7 We consider that reduced bacterial growth can lead to decreased phage predation, through reduced  
8 adsorption ( $\beta$ ) and/or burst size ( $\delta$ ). Equations (18) and (19) allow these parameters to decrease as  
9 bacterial growth decreases, using the same principle of logistic growth as seen in equation (7).

$$10 \quad \beta = \beta_{max} * \left(1 - \frac{N}{N_{max}}\right) \quad (18)$$

$$11 \quad \delta = \delta_{max} * \left(1 - \frac{N}{N_{max}}\right) \quad (19)$$

12 If we do not link these parameters to bacterial growth, we assign them their maximum values.

$$13 \quad \beta = \beta_{max} \quad (20)$$

$$14 \quad \delta = \delta_{max} \quad (21)$$

15

### 16 *Model fitting*

17 We fit our model to the *in vitro* data using the Markov chain Monte Carlo Metropolis–Hastings  
18 algorithm. For every iteration, this algorithm slightly changes the parameter values, runs the model,  
19 assesses the resulting model fit to the data, and accepts or rejects these new parameter values based  
20 on whether the model fit is better or worse than with the previous set of values. We run the algorithm  
21 with two chains, and once convergence has been reached (determined using the Gelman-Rubin  
22 diagnostic, once the multivariate potential scale reduction factor is less than 1.2<sup>49</sup>), we generate

1 50,000 samples from the posterior distributions for each parameter. Convergence and posterior  
2 distribution plots for our best-fitting model are shown in Supplementary Fig. 6.

3 In a first instance, we used our growth co-culture data, where phage are absent, to calibrate the  
4 bacterial growth rate parameters  $\mu_{\max\theta}$  for each bacteria strain  $\theta$  ( $\theta \in \{E, T, ET\}$ ), as well as the carrying  
5 capacity  $N_{\max}$  using a simple logistic growth model (equation (7)). All other parameters related to  
6 phage predation were set to 0.

7 The phage predation parameters ( $\tau$ ,  $\alpha$ ,  $\beta_{\max}$ ,  $\delta_{\max}$ ) were jointly estimated by fitting to the phage and  
8 double resistant bacteria numbers from the transduction co-culture data. Fitting was performed by  
9 evaluating the log-likelihood of each *in vitro* data point being observed in a Poisson distribution, with  
10 the corresponding model data point as a mean.

11 To mirror our experimental sampling variation, *in vitro* data points were scaled down to be between  
12 1 and 100 before fitting, with the same correction applied to the corresponding model-predicted value  
13 for the same timepoint. For example, if at 1h there are  $1.4 \times 10^4$  phage *in vitro*, this is scaled down to  
14 14, and if the corresponding model value is  $5.3 \times 10^6$ , this is scaled down by the same magnitude (i.e.  
15  $10^3$ ), resulting in a value of 5300.

16 Previous research estimated that the latent period for  $80\alpha$  in *S. aureus* was approximately 40mins  
17 (0.67h), and that the burst size was approximately 40 phage per bacterium<sup>36</sup>. Since this study did not  
18 provide error values for these point estimates, we assumed the standard deviation and chose the  
19 following informative priors for these parameters:  $\tau \sim Normal(0.67, 0.07)$  (95% confidence interval:  
20 0.53-0.81) and  $\delta_{\max} \sim Normal(40, 7)$  (95% confidence interval: 54-26). Due to a lack of available data,  
21 we used uninformative priors for the remaining parameters:  $\alpha \sim Uniform(0, 1)$  and  $\beta_{\max} \sim Uniform(0,$   
22  $1)$ .

23

24

## 1 References

- 2 1. Laxminarayan, R. *et al.* Antibiotic resistance—the need for global solutions. *Lancet Infect. Dis.*  
3 **13**, 1057–1098 (2013).
- 4 2. Levin, B. R. & Bull, J. J. Population and evolutionary dynamics of phage therapy. *Nat. Rev.*  
5 *Microbiol.* **2**, 166–173 (2004).
- 6 3. Clokie, M. R. J., Millard, A. D., Letarov, A. V. & Heaphy, S. Phages in nature. *Bacteriophage* **1**, 31–  
7 45 (2011).
- 8 4. von Wintersdorff, C. J. H. *et al.* Dissemination of Antimicrobial Resistance in Microbial  
9 Ecosystems through Horizontal Gene Transfer. *Front. Microbiol.* **7**, (2016).
- 10 5. Fernández, L., Rodríguez, A. & García, P. Phage or foe: an insight into the impact of viral  
11 predation on microbial communities. *ISME J.* **12**, 1171–1179 (2018).
- 12 6. McCarthy, A. J. *et al.* Extensive Horizontal Gene Transfer during *Staphylococcus aureus* Co-  
13 colonization In Vivo. *Genome Biol. Evol.* **6**, 2697–2708 (2014).
- 14 7. Haaber, J., Penadés, J. R. & Ingmer, H. Transfer of Antibiotic Resistance in *Staphylococcus*  
15 *aureus*. *Trends Microbiol.* **25**, 893–905 (2017).
- 16 8. Balcázar, J. L. How do bacteriophages promote antibiotic resistance in the environment? *Clin.*  
17 *Microbiol. Infect.* **24**, 447–449 (2018).
- 18 9. Verheust, C., Pauwels, K., Mahillon, J., Helinski, D. R. & Herman, P. Contained use of  
19 Bacteriophages: Risk Assessment and Biosafety Recommendations. *Appl. Biosaf.* **15**, 32–44  
20 (2010).
- 21 10. Jassim, S. A. A. & Limoges, R. G. Natural solution to antibiotic resistance: bacteriophages ‘The  
22 Living Drugs’. *World J. Microbiol. Biotechnol.* **30**, 2153–2170 (2014).
- 23 11. Hassan, A. Y., Lin, J. T., Ricker, N. & Anany, H. The Age of Phage: Friend or Foe in the New Dawn  
24 of Therapeutic and Biocontrol Applications? *Pharmaceuticals* **14**, 199 (2021).
- 25 12. Raj, J. R. M. & Karunasagar, I. Phages amid antimicrobial resistance. *Crit. Rev. Microbiol.* **45**, 701–



- 1        711 (2019).
- 2    13. Leclerc, Q. J., Lindsay, J. A. & Knight, G. M. Mathematical modelling to study the horizontal  
3        transfer of antimicrobial resistance genes in bacteria: current state of the field and  
4        recommendations. *J. R. Soc. Interface* **16**, 20190260 (2019).
- 5    14. Krysiak-Baltyn, K., Martin, G. J. O., Stickland, A. D., Scales, P. J. & Gras, S. L. Computational  
6        models of populations of bacteria and lytic phage. *Crit. Rev. Microbiol.* **42**, 942–968 (2016).
- 7    15. Campbell, A. Conditions for the Existence of Bacteriophage. *Evolution* **15**, 153–165 (1961).
- 8    16. Levin, B. R., Stewart, F. M. & Chao, L. Resource-Limited Growth, Competition, and Predation: A  
9        Model and Experimental Studies with Bacteria and Bacteriophage. *Am. Nat.* **111**, 3–24 (1977).
- 10   17. Weld, R. J., Butts, C. & Heinemann, J. A. Models of phage growth and their applicability to phage  
11        therapy. *J. Theor. Biol.* **227**, 1–11 (2004).
- 12   18. Schrag, S. J. & Mittler, J. E. Host-Parasite Coexistence: The Role of Spatial Refuges in Stabilizing  
13        Bacteria-Phage Interactions. *Am. Nat.* **148**, 348–377 (1996).
- 14   19. Santos, S. B., Carvalho, C., Azeredo, J. & Ferreira, E. C. Population Dynamics of a Salmonella Lytic  
15        Phage and Its Host: Implications of the Host Bacterial Growth Rate in Modelling. *PLOS ONE* **9**,  
16        e102507 (2014).
- 17   20. Kokjohn, T. A. & Sayler, G. S. Y. Attachment and replication of *Pseudomonas aeruginosa*  
18        bacteriophages under conditions simulating aquatic environments. *Microbiology* **137**, 661–666  
19        (1991).
- 20   21. Hadas, H., Einav, M., Fishov, I. & Zaritsky, A. Bacteriophage T4 Development Depends on the  
21        Physiology of its Host *Escherichia Coli*. *Microbiology* **143**, 179–185 (1997).
- 22   22. Middelboe, M. Bacterial Growth Rate and Marine Virus–Host Dynamics. *Microb. Ecol.* **40**, 114–  
23        124 (2000).
- 24   23. Nabergoj, D., Modic, P. & Podgornik, A. Effect of bacterial growth rate on bacteriophage  
25        population growth rate. *MicrobiologyOpen* **7**, e00558 (2018).
- 26   24. Buckling, A. & Rainey, P. B. . Antagonistic coevolution between a bacterium and a

- 1 bacteriophage. *Proc. R. Soc. Lond. B Biol. Sci.* **269**, 931–936 (2002).
- 2 25. Volkova, V. V., Lu, Z., Besser, T. & Gröhn, Y. T. Modeling the Infection Dynamics of
- 3 Bacteriophages in Enteric Escherichia coli: Estimating the Contribution of Transduction to
- 4 Antimicrobial Gene Spread. *Appl. Environ. Microbiol.* **80**, 4350–4362 (2014).
- 5 26. Arya, S. *et al.* A generalised model for generalised transduction: the importance of co-evolution
- 6 and stochasticity in phage mediated antimicrobial resistance transfer. *FEMS Microbiol. Ecol.* **96**,
- 7 (2020).
- 8 27. Fillol-Salom, A. *et al.* Bacteriophages benefit from generalized transduction. *PLOS Pathog.* **15**,
- 9 e1007888 (2019).
- 10 28. Cassini, A. *et al.* Attributable deaths and disability-adjusted life-years caused by infections with
- 11 antibiotic-resistant bacteria in the EU and the European Economic Area in 2015: a population-
- 12 level modelling analysis. *Lancet Infect. Dis.* **19**, 56–66 (2019).
- 13 29. Lindsay, J. A. Staphylococcus aureus genomics and the impact of horizontal gene transfer. *Int. J.*
- 14 *Med. Microbiol.* **304**, 103–109 (2014).
- 15 30. Kifelew, L. G. *et al.* Efficacy of phage cocktail AB-SA01 therapy in diabetic mouse wound
- 16 infections caused by multidrug-resistant Staphylococcus aureus. *BMC Microbiol.* **20**, 204 (2020).
- 17 31. Petrovic Fabijan, A. *et al.* Safety of bacteriophage therapy in severe Staphylococcus aureus
- 18 infection. *Nat. Microbiol.* **5**, 465–472 (2020).
- 19 32. Abedon, S. T. & Katsaounis, T. I. Basic Phage Mathematics. in *Bacteriophages: Methods and*
- 20 *Protocols, Volume 3* (eds. Clokie, M. R. J., Kropinski, A. M. & Lavigne, R.) 3–30 (Springer, 2018).
- 21 doi:10.1007/978-1-4939-7343-9\_1.
- 22 33. Kasman, L. M. *et al.* Overcoming the Phage Replication Threshold: a Mathematical Model with
- 23 Implications for Phage Therapy. *J. Virol.* **76**, 5557–5564 (2002).
- 24 34. Eriksen, R. S., Mitarai, N. & Sneppen, K. Sustainability of spatially distributed bacteria-phage
- 25 systems. *Sci. Rep.* **10**, 3154 (2020).
- 26 35. Spiegelhalter, D. J., Best, N. G., Carlin, B. P. & Linde, A. V. D. Bayesian measures of model

- 1 complexity and fit. *J. R. Stat. Soc. Ser. B Stat. Methodol.* **64**, 583–639 (2002).
- 2 36. Sjöström, J.-E., Lindberg, M. & Philipson, L. Transfection of *Staphylococcus aureus* with  
3 Bacteriophage Deoxyribonucleic Acid. *J. Bacteriol.* **109**, 285–291 (1972).
- 4 37. Berryhill, B. A., Huseby, D. L., McCall, I. C., Hughes, D. & Levin, B. R. Evaluating the potential  
5 efficacy and limitations of a phage for joint antibiotic and phage therapy of *Staphylococcus*  
6 *aureus* infections. *Proc. Natl. Acad. Sci.* **118**, (2021).
- 7 38. Suttle, C. A. & Chen, F. Mechanisms and Rates of Decay of Marine Viruses in Seawater. *Appl.*  
8 *Environ. Microbiol.* **58**, 3721–3729 (1992).
- 9 39. Peterson, B. W., Sharma, P. K., van der Mei, H. C. & Busscher, H. J. Bacterial Cell Surface Damage  
10 Due to Centrifugal Compaction. *Appl. Environ. Microbiol.* **78**, 120–125 (2012).
- 11 40. Mašlaňová, I., Stříbná, S., Doškař, J. & Pantůček, R. Efficient plasmid transduction to  
12 *Staphylococcus aureus* strains insensitive to the lytic action of transducing phage. *FEMS*  
13 *Microbiol. Lett.* **363**, (2016).
- 14 41. Jiang, S. C. & Paul, J. H. Gene Transfer by Transduction in the Marine Environment. *Appl.*  
15 *Environ. Microbiol.* **64**, 2780–2787 (1998).
- 16 42. Fišarová, L. *et al.* *Staphylococcus epidermidis* Phages Transduce Antimicrobial Resistance  
17 Plasmids and Mobilize Chromosomal Islands. *mSphere* **6**, (2021).
- 18 43. R Core Team. *R: A Language and Environment for Statistical Computing.* (R Foundation for  
19 Statistical Computing, 2020).
- 20 44. Fey, P. D. *et al.* A Genetic Resource for Rapid and Comprehensive Phenotype Screening of  
21 Nonessential *Staphylococcus aureus* Genes. *mBio* **4**, (2013).
- 22 45. Khan, S. A. & Novick, R. P. Complete nucleotide sequence of pT181, a tetracycline-resistance  
23 plasmid from *Staphylococcus aureus*. *Plasmid* **10**, 251–259 (1983).
- 24 46. Christie, G. E. *et al.* The complete genomes of *Staphylococcus aureus* bacteriophages 80 and  
25 80 $\alpha$ —Implications for the specificity of SaPI mobilization. *Virology* **407**, 381–390 (2010).
- 26 47. Veiga, H. & Pinho, M. G. Inactivation of the Saul Type I Restriction-Modification System Is Not

- 1 Sufficient To Generate *Staphylococcus aureus* Strains Capable of Efficiently Accepting Foreign  
2 DNA. *Appl. Environ. Microbiol.* **75**, 3034–3038 (2009).
- 3 48. Adams, M. H. *Bacteriophages*. (Interscience Publishers, 1959).
- 4 49. Gelman, A. & Rubin, D. B. Inference from Iterative Simulation Using Multiple Sequences. *Stat.*  
5 *Sci.* **7**, 457–472 (1992).

6

## 7 **Acknowledgments**

8 Q.J.L and J.W. were supported by a studentship from the Medical Research Council Intercollegiate  
9 Doctoral Training Program (MR/N013638/1). A.G. and G.M.K were supported by grants from the  
10 Medical Research Council (MR/P028322/1 and MR/P014658/1 respectively).

11

## 12 **Authors' contributions**

13 Conceptualization: Q.J.L, J.A.L & G.M.K. Data Curation: Q.J.L. Formal Analysis: Q.J.L. Investigation:  
14 Q.J.L & J.W. Methodology: Q.J.L, J.W, A.G, J.A.L & G.M.K. Software: Q.J.L. Supervision: J.A.L & G.M.K.  
15 Validation: J.A.L & G.M.K. Visualization: Q.J.L, J.W, J.A.L & G.M.K. Writing – Original Draft  
16 Preparation: Q.J.L. Writing – Review and Editing: Q.J.L, J.W, A.G, J.A.L & G.M.K.

17

## 18 **Competing interests**

19 The authors declare no competing interests.

20
